# Supplementary material for: Does preoperative rehabilitation for patients planning to undergo joint replacement surgery improve outcomes? A systematic review and meta-analysis of randomised controlled trials
Source: HighWire-hosted journal article supplement (doi:10.1136/bmjopen-2015-009857), 2016-02-01
Supplement: bmjopen-2015-009857supp_table1.pdf [file bmjopen-2015-009857supp_table1.pdf]

**Supplementary table 1 Intervention characteristics of included RCTs**

| <b>Study Name</b>    | <b>Intervention</b>                                 | <b>Compliance</b>                                                                                                                                             | <b>Control</b>                                  | <b>Postop intervention</b>                                                    |                                                                 |
|----------------------|-----------------------------------------------------|---------------------------------------------------------------------------------------------------------------------------------------------------------------|-------------------------------------------------|-------------------------------------------------------------------------------|-----------------------------------------------------------------|
| <b>Beaupre 2004</b>  | physiotherapist supervised exercise                 | land based: strengthening, aerobic; supervised by physiotherapist; 3 times/week * 4 weeks + education                                                         | all but 1 participant completed the 12 sessions | usual care: regular activities and other treatment at discretion of physician | standard postoperative mobilization routine                     |
| <b>Bitterli 2011</b> | home exercise                                       | land based: strengthening and stretching, home exercises from 2 to 6 weeks, twice daily; 2 verbal and written instruction                                     | exercises completed on 91% of the days          | no intervention                                                               | usual care (outpatient rehabilitation or rehabilitation clinic) |
| <b>Brown 2012</b>    | physiotherapist supervised exercise + home exercise | land based: strengthening and stretching, supervised by physiotherapist once a week + home exercise 2 times/week * 8 weeks                                    | not reported                                    | usual care                                                                    | not reported                                                    |
| <b>D'Lima 1996</b>   | physiotherapist supervised exercise                 | Intervention A: land based: strengthening, stretching.<br>Intervention B: land based and pool based: strengthening, stretching, aerobic; once a week * 8weeks | not reported                                    | no intervention                                                               | routine care                                                    |

|                        |                                                     |                                                                                                                                                     |                          |                                      |                                       |
|------------------------|-----------------------------------------------------|-----------------------------------------------------------------------------------------------------------------------------------------------------|--------------------------|--------------------------------------|---------------------------------------|
| <b>Evgeniadis 2008</b> | physiotherapist or orthopedist supervised exercise  | land based: strengthening (mostly upper limb and trunk), 3 times/week * 3                                                                           | not reported             | no intervention                      | standard rehabilitation               |
| <b>Ferrara 2008</b>    | physiotherapist supervised exercise + education     | land based: strengthening, aerobic; supervised by physiotherapist; 5 times/week * 4 weeks + education                                               | not reported             | no intervention                      | postop rehabilitation programme       |
| <b>Gilbey 2003</b>     | physiotherapist supervised exercise+ home exercise  | land based and pool based: strengthening, stretching, aerobic, supervised by physiotherapist + home exercise: 2 times/week *8weeks                  | 97% of sessions complete | routine in-hospital physical therapy | clinic-based                          |
| <b>Gocen 2004</b>      | physiotherapist supervised exercise + education     | land based: strengthening, stretching, supervised by physiotherapist for 8 weeks; +education                                                        | not reported             | no intervention                      | postoperative and education programme |
| <b>Gstoettner 2011</b> | physiotherapist supervised exercise + home exercise | land based: strengthening, stretching, balance; supervised by physiotherapist; once a week * 6 weeks +daily home training with written instructions | not reported             | no intervention                      | not reported                          |

|                       |                                                     |                                                                                                                                                                               |                               |                                     |                                                    |
|-----------------------|-----------------------------------------------------|-------------------------------------------------------------------------------------------------------------------------------------------------------------------------------|-------------------------------|-------------------------------------|----------------------------------------------------|
| <b>Hoogeboom 2010</b> | physiotherapist supervised exercise                 | land based: strengthening, aerobic, functional; + education                                                                                                                   | 91% of the sessions completed | usual care + education              | postop usual care protocol                         |
| <b>Matassi 2014</b>   | physiotherapist supervised exercise + home exercise | land based: increasing lower extremity muscle strengthening supervised by physiotherapist; once a week* 1 week+ home exercise 5 times/week * 6weeks+ written instructions     | 79.4% completed               | regular activities                  | same physiotherapy routines                        |
| <b>McKay 2012</b>     | kinesiologist supervised exercise                   | land based: aerobic, strengthening, supervised by kinesiologist; 3 times/week * 6 weeks                                                                                       | 98% of the sessions completed | placebo (upper body exercises)      | standard postop care                               |
| <b>Mitchell 2005</b>  | physiotherapist supervised exercise + home exercise | land based: pain relief, increase knee flexion and extension, gait re-education ,supervised by physiotherapist; 3 times/week * 8 weeks + home exercise 4 times/week * 8 weeks | 73.6% sessions completed      | preoperative consultation           | usual hospital physiotherapy (post-discharge only) |
| <b>Oosting 2012</b>   | physiotherapist supervised exercise +home exercise  | land based: "functional tasks exercise", supervised by physiotherapist; 2 times/week + home exercise 4 times/week * 3 to 6 weeks                                              | 99% of the sessions completed | usual care (30min supervised class) | not reported                                       |

|                              |                                                        |                                                                                                                                                                 |                                                                  |                                                                           |                       |
|------------------------------|--------------------------------------------------------|-----------------------------------------------------------------------------------------------------------------------------------------------------------------|------------------------------------------------------------------|---------------------------------------------------------------------------|-----------------------|
| <b>Rooks 2006</b>            | physiotherapist supervised<br>exercise +education      | land based and pool based: strengthening,<br>stretching, aerobic, supervised by<br>physiotherapist; 3 times/week * 6 weeks;<br>+education on home modifications | 89% of sessions<br>completed                                     | education via leaflet<br>and telephone + 30-<br>60min supervised<br>class | not reported          |
| <b>Topp 2009</b>             | physiotherapist supervised<br>exercise + home exercise | land based: resistance training, flexibility,<br>step training, supervised by physiotherapist,<br>once a week + home exercise 2 times /week                     | 13 sessions<br>completed (range 4<br>to 23)                      | no intervention                                                           | postop rehabilitation |
| <b>Tungtrongjit<br/>2012</b> | home exercise                                          | land based: home quadriceps strengthening<br>exercise for 3 weeks                                                                                               | Not reported                                                     | no intervention                                                           | postop rehabilitation |
| <b>Villadsen<br/>2014</b>    | physiotherapist supervised<br>exercise                 | land based: standard preoperative educational<br>package + NEMEX programme; supervised<br>by physiotherapist; 2 times/week * 8 weeks                            | 74% attended the<br>pre-specified goal of<br>12 or more exercise | standard preoperative<br>educational package                              | postop rehabilitation |
| <b>Vukomanovic<br/>2008</b>  | physiotherapist supervised<br>exercise +education      | land based: physical therapy +education                                                                                                                         | not reported                                                     | no intervention                                                           | postop rehabilitation |
| <b>Wang 2002</b>             | physiotherapist supervised<br>exercise + home exercise | land based and pool based: strengthening,<br>stretching, aerobic, supervised by<br>physiotherapist+ home exercise; 2 times/week                                 | 97% of sessions<br>complete                                      | routine perioperative<br>care                                             | postop rehabilitation |

---

|                    |                            |                                                 |              |                       |              |
|--------------------|----------------------------|-------------------------------------------------|--------------|-----------------------|--------------|
|                    |                            | * 8 weeks                                       |              |                       |              |
| <b>Weidenhielm</b> | physiotherapist supervised | land based: strengthening, stretching, aerobic, | not reported | no intervention       | not reported |
| <b>1993</b>        | exercise + home exercise   | supervised by physiotherapist, 3 times/week     |              |                       |              |
|                    |                            | * 5 weeks; + home exercise daily                |              |                       |              |
| <b>Williamson</b>  | physiotherapist supervised | land based: strengthening, stretching, balance, | not reported | education and leaflet | not reported |
| <b>2007</b>        | exercise + home exercise   | supervised by physiotherapist; 1 times/week *   |              | +1 hour supervised    |              |
|                    |                            | 6 weeks + home exercise                         |              | class + home exercise |              |

---

NEMEX: neuromuscular exercise programme
