# Supplementary material for: Does preoperative rehabilitation for patients planning to undergo joint replacement surgery improve outcomes? A systematic review and meta-analysis of randomised controlled trials
Source: HighWire-hosted journal article supplement (doi:10.1136/bmjopen-2015-009857), 2016-02-01
Supplement: bmjopen-2015-009857supp_table2.pdf [file bmjopen-2015-009857supp_table2.pdf]

**Supplementary Table 2 Description of RCTs of Prehabilitation versus No Prehabilitation for TKR/THR**

| Study Name    | No. of patients | Type of surgery | Comparison                                                                  | Rehabilitation                                | Results                                                                              |                                                                                                                                                                                   |                                                                           |                                                                                                                                                                                       |                                                                                                                                 |
|---------------|-----------------|-----------------|-----------------------------------------------------------------------------|-----------------------------------------------|--------------------------------------------------------------------------------------|-----------------------------------------------------------------------------------------------------------------------------------------------------------------------------------|---------------------------------------------------------------------------|---------------------------------------------------------------------------------------------------------------------------------------------------------------------------------------|---------------------------------------------------------------------------------------------------------------------------------|
|               |                 |                 |                                                                             |                                               | Pain                                                                                 | Function improvement                                                                                                                                                              | Quality of Life                                                           | Resource use                                                                                                                                                                          | others                                                                                                                          |
| Beaupre 2004  | 131             | TKR             | PT supervised exercise + postop education vs. usual care                    | Standard postop mobilization routine          | WOMAC pain: NS<br>SF-36 bodily pain: NS<br>NS<br>from 3mo. to 1 year postoperatively | Knee ROM: NS;<br>Quadriceps strength: NS;<br>Hamstring Strength: NS<br>WOMAC stiffness and function: NS;<br>SF-36 physical functioning: NS<br>from 3mo. to 1 year postoperatively | SF-36: NS in each domains, PCS, and MCS from 3mo. to 1 yr postoperatively | Acute care LOS, transfer LOS, readmission LOS, and total LOS: NS (total LOS: -1.5 d)<br>Institutional costs, homecare costs, readmission costs, total costs: NS (total cost: + \$33); | Postoperative complications:e. g. pulmonary emboli (n=2), deep vein thrombosis (n=9), infection (n=5), postoperative Angina: NS |
| Bitterli 2011 | 80              | THR             | Preoperative sensorimotor training at home (daily exercises at home) vs. no | Postop. Standard therapy protocol in hospital | SF-36 pain: : NS after surgery (4mo.,1 year)                                         | SF-36 physical function: NS after surgery (4mo,1 year)<br>WOMAC: NS after surgery (4mo, 1year)                                                                                    | SF-36: NS in each domains after surgery (4mo.,1year)                      | LOS: NS (14.6 vs. 14.6 d)                                                                                                                                                             | -                                                                                                                               |

|                 |    |     | therapy                                                                                          | Usual care                             |                                                                     |                                                                             |                                                                             |         |   |   |
|-----------------|----|-----|--------------------------------------------------------------------------------------------------|----------------------------------------|---------------------------------------------------------------------|-----------------------------------------------------------------------------|-----------------------------------------------------------------------------|---------|---|---|
|                 |    |     |                                                                                                  | therapeutic modalities after discharge |                                                                     |                                                                             |                                                                             |         |   |   |
| Brown 2012      | 32 | TKR | Preop. exercise intervention vs. no prehabilitation                                              | -                                      | SF-36 pain : NS at 3mo. after surgery                               | SF-physical function score: ↑(MD+27.1)                                      | SF-36:↑ in physical function score (MD+27.1)                                | -       | - | - |
|                 |    |     |                                                                                                  |                                        |                                                                     |                                                                             | NS in other domains                                                         |         |   |   |
| D'Lima 1996     | 30 | TKR | Preop physical therapy vs. cardiovascular conditioning program with exercise vs. no intervention | -                                      | Hospital for Special Surgery Knee Rating pain(0-30):NS from 3wk 1yr | Hospital for Special Surgery Knee Rating function (0-52):NS from 3wk to 1yr | Quality of Well Being scores (0-1): Percentage improvement - NS             | LOS: NS | - | - |
|                 |    |     |                                                                                                  |                                        |                                                                     |                                                                             | Arthritis impact measurement scale scores (0-10): Percentage improvement NS |         |   |   |
| Evgeniadis 2008 | 48 | TKR | Preop.exercise vs. no intervention                                                               | -                                      | -                                                                   | ILAS score: NS after surgery(2, 6, 10, 14wks )                              | SF-36: NS at 1 day pervious to surgery (preop)                              | -       | - | - |
|                 |    |     |                                                                                                  |                                        |                                                                     | Active ROM:NS after surgery                                                 |                                                                             |         |   |   |

---

(2, 10, 14wks )

|                 |    |     |                                                                                     |                                                                                                |                                                                          |                                                                                                                                                                                                                                                         |                                                                                   |   |   |
|-----------------|----|-----|-------------------------------------------------------------------------------------|------------------------------------------------------------------------------------------------|--------------------------------------------------------------------------|---------------------------------------------------------------------------------------------------------------------------------------------------------------------------------------------------------------------------------------------------------|-----------------------------------------------------------------------------------|---|---|
| Ferrara<br>2008 | 23 | THR | Educational and<br>PT supervised<br>physiotherapy<br>program vs. no<br>intervention | Postop. 4weeks<br>standard<br>exercise<br>protocol                                             | VAS: ↓ at 1, 3 mo.<br>(MD -1.8, -0.97)<br><br>WOMAC pain: NS at<br>3 mo. | ROM external rotation: ↑ at<br>15days, 1 and 3 mo. after<br>surgery<br>(MD +7.69, +0.14)                                                                                                                                                                | SF-36 PCS: ↑ at 1 mo,<br>but NS at 3 mo<br>(MD +7.1 at 1 mo)<br><br>SF-36 MCS: NS | - | - |
|                 |    |     |                                                                                     |                                                                                                |                                                                          | Harris Hip Score: NS at 1 and<br>3mo<br><br>Barthel Index: NS at 1 and 3mo<br><br>WOMAC stiffness and<br>function: NS at 3mo                                                                                                                            |                                                                                   |   |   |
| Gilbey<br>2003  | 76 | THR | 8wks customized<br>exercise<br>program vs. no<br>exercise                           | Postop. Exercise<br>program (until<br>12wks after<br>surgery) VS<br>routine in-<br>hospital PT | WOMAC pain: NS                                                           | Mean ROM at 3, 12, 24wks: ↑<br>(MD+6,+11,+12 )<br><br>Hip strength mean Z score<br>after surgery (12, 24wks): ↑<br>(MD+0.35, +0.6)<br><br>WOMAC total score after<br>surgery (3,12,24wks): ↑(MD+8,<br>+9, +9)<br><br>WOMAC stiffness: NS,<br>3,12,24wks |                                                                                   | - | - |

---

---

|                    |    |     |                                                                                |                                                           |                                                                                                    |                                                                                                                                                                                                                                                                                                                         |   |         |   |
|--------------------|----|-----|--------------------------------------------------------------------------------|-----------------------------------------------------------|----------------------------------------------------------------------------------------------------|-------------------------------------------------------------------------------------------------------------------------------------------------------------------------------------------------------------------------------------------------------------------------------------------------------------------------|---|---------|---|
|                    |    |     |                                                                                |                                                           |                                                                                                    | WOMAC function: ↑ 3, 12,<br>24wks                                                                                                                                                                                                                                                                                       |   |         |   |
| Gocen<br>2004      | 60 | THR | Physiotherapy<br>and educational<br>program vs. no<br>exercise or<br>education | Routine postop.<br>Exercise and<br>educational<br>program | VAS at rest at<br>discharge: NS (MD-<br>0.12)<br>VAS at activity at<br>discharge: NS (MD-<br>0.06) | Hip adduction at discharge: NS<br>(MD-0.1)<br>Harris Hip Score: NS at 3mo, 2<br>years after surgery<br>(MD+0.9,+4)                                                                                                                                                                                                      | - | LOS: NS | - |
| Gstoettner<br>2011 | 38 | TKR | PT supervised<br>exercise vs. no<br>exercise                                   | -                                                         | WOMAC pain: NS;<br>6wk postoperatively                                                             | KSS: NS;<br>KSS function: NS;<br>WOMAC stiffness: NS;<br>WOMAC function: NS;<br>Gait speed (60m):NS;<br>Gait speed (stairs up):NS;<br>Gait speed (stairs down): NS;<br>Knee stability (OSI): NS;<br>Knee stability (MLSI) : NS;<br>6wk postoperatively<br><br>Knee stability (APSI) : ↓ (MD<br>-0.6) 6wkpostoperatively | - | -       | - |

---

|                |     |     |                                                                 |                                            |                                                    |                                                                                                                                                                                                                                                         |                                                                |                         |                                                                                                              |
|----------------|-----|-----|-----------------------------------------------------------------|--------------------------------------------|----------------------------------------------------|---------------------------------------------------------------------------------------------------------------------------------------------------------------------------------------------------------------------------------------------------------|----------------------------------------------------------------|-------------------------|--------------------------------------------------------------------------------------------------------------|
| Hoogeboom 2010 | 21  | THR | Therapeutic exercise program vs. usual care                     | Postop. usual care protocol till discharge | HOOS pain: NS<br>VAS: NS<br>At baseline and preop, | Functional recovery: NS<br>HOOS (in all domains): NS<br>LASA physical activity questionnaire (all domains): NS<br>At baseline and preop                                                                                                                 | Patient-specific complaints (PSK): NS<br>At baseline and preop | LOS: NS<br>6 vs. 6 days | 2 postoperative complications in exercise group: femur fracture and intestinal obstruction.<br>no serious AE |
| Matassi 2014   | 122 | TKR | Preoperative home exercise program vs. regular activities       | Same postop. physiotherapy routine         | -                                                  | Mean time to reach 90° of knee ROM: ↓ (MD -1.1 day)<br>Active knee flexion: NS at 6wks. 6mo, 1yr<br>Passive knee flexion: NS at 6wks. 6mo, 1yr<br>Knee score or patient function score (Knee Society Clinical Rating System): NS at 6wks, 6 mos. 1 yrs. | -                                                              | LOS: ↓<br>(MD -0.8 day) | -                                                                                                            |
| McKay 2012     | 22  | TKR | Lower-body strength training program vs. nonspecific upper-body | Standard postop. care                      | WOMAC pain: NS, MD+0.7, +0.9 at 6 and 12wks.       | SF-36 PSC: NS<br>Quadriceps strength: NS<br>50-foot walk: NS<br>Stair test: NS<br>Arthritis self-efficacy                                                                                                                                               | SF-36 (PCS, MCS): NS after surgery                             | -                       | -                                                                                                            |

|               |     |     |                                                                                                       |                                     |                                                          |                                                                                                                                                               |                                                                                                            |                                                                               |                                                                                                                                          |
|---------------|-----|-----|-------------------------------------------------------------------------------------------------------|-------------------------------------|----------------------------------------------------------|---------------------------------------------------------------------------------------------------------------------------------------------------------------|------------------------------------------------------------------------------------------------------------|-------------------------------------------------------------------------------|------------------------------------------------------------------------------------------------------------------------------------------|
|               |     |     | strength training program (placebo)                                                                   |                                     |                                                          | (including pain, physical function, and other symptoms):                                                                                                      |                                                                                                            |                                                                               |                                                                                                                                          |
| Mitchell 2005 | 160 | TKR | PT supervised pre- & postop home exercise (home PT) vs. no pre-op exercise + usual hospital PT postop | Postop home exercise or hospital PT | WOMAC pain: NS<br>SF-36 bodily pain: NS<br>NS<br>at 12wk | WOMAC physical function: NS;<br>WOMAC stiffness: NS;<br>SF-36 physical function: NS<br>at 12wk                                                                | SF-36: NS in each domains<br>SF-6D: NS<br>Patient satisfaction with PT: NS (86% in both groups)<br>at 12wk | LOS: NS (MD - 0.4d)<br>Cost of PT: NS(MD + £1.4)<br>Total cost: NS(MD + £4.7) | 45 withdrawn patients had significantly poor score on the SF-36 general health, energy, and more reported heart problems and stroke/TIA. |
| Oosting 2012  | 30  | THA | PT supervised exercise vs. usual care                                                                 | -                                   | HOOS pain: NS<br>VAS: NS<br>6wk changes from baseline.   | TUG: NS;<br>CRT: ↓ (MD -9.2s);<br>6MWT: NS;<br>PSC: NS;<br>HOOS other symptoms, function in daily living, function in sport and recreation: NS;<br>LAPAQ: NS; | HOOS hip-related quality of life: NS<br>Patient Specific Complaints (PSC) questionnaire score: NS          | LOS: NS (MD - 0.3d)<br>Nursing home after discharge: NS                       | No severe adverse events<br>Complications: e.g. Wound, delirium, loss of sensation, decubitus ulcers, and                                |

|               |     |             |                                                      |                                 | 6wk post-discharge changes                                                                        |                                                                                                                                                                                                                                                                       |   |   |   |
|---------------|-----|-------------|------------------------------------------------------|---------------------------------|---------------------------------------------------------------------------------------------------|-----------------------------------------------------------------------------------------------------------------------------------------------------------------------------------------------------------------------------------------------------------------------|---|---|---|
|               |     |             |                                                      |                                 | from baseline                                                                                     |                                                                                                                                                                                                                                                                       |   |   |   |
| Rooks<br>2006 | 108 | THA+<br>TKA | PT supervised<br>exercise+education<br>vs. education | -                               | For THR:<br>WOMAC pain: NS<br>SF-36 pain: NS<br>8wk and 26wk<br>postoperatively                   | For both THR and TKR:<br>WOMAC function: NS;<br>SF-36 physical function: NS<br>SF-36 role limitation physical:<br>NS;<br>1-repetition maximum: NS ;<br>Timed up and go: NS ;<br>8wk and 26wk postoperatively<br>Functional reach: NS ;<br>8wk and 26wkpostoperatively | - | - | - |
|               |     |             |                                                      |                                 | SF-36 pain: NS<br>8wk postoperatively<br>SF-36 pain:<br>↑(MD+11.5 ) 26wk<br>changes from baseline |                                                                                                                                                                                                                                                                       |   |   |   |
| Topp<br>2009  | 54  | TKA         | PT supervised<br>exercise vs.<br>usual care          | Postoperative<br>rehabilitation | Pain in Sit-to-stand,<br>6MWT, Ascent and<br>descent stairs: NS?<br>at 1, 3mo.                    | Sit-to-stand: NS?<br>6MWT: NS?<br>Ascent and descent stairs: NS?<br>Maximum extension strength of                                                                                                                                                                     | - | - | - |

|           |    |     |                         |   |                             |                                                   |   |   |   |
|-----------|----|-----|-------------------------|---|-----------------------------|---------------------------------------------------|---|---|---|
|           |    |     |                         |   | postoperatively             | the surgical knee, nonsurgical                    |   |   |   |
|           |    |     |                         |   | No between-group comparison | knee: ?                                           |   |   |   |
|           |    |     |                         |   |                             | Maximum extension strength of the surgical knee:? |   |   |   |
|           |    |     |                         |   |                             | at 1, 3mo. postoperatively                        |   |   |   |
|           |    |     |                         |   |                             | No between-group comparison                       |   |   |   |
| Tungtron  | 60 | TKA | Quadriceps              | - | Modified WOMAC              | Total Modified WOMAC                              | - | - | - |
| gjit 2012 |    |     | exercise vs. usual care |   | pain score: ↓ (MD -6.3)     | score: ↓ (MD -26.7)                               |   |   |   |
|           |    |     |                         |   | VAS: ↓ (MD -0.9)            | Modified WOMAC stiffness score: ↓ (MD -2.5)       |   |   |   |
|           |    |     |                         |   | at 1 mo postoperatively     | Modified WOMAC function score: ↓ (MD -17.7)       |   |   |   |
|           |    |     |                         |   | Modified WOMAC              | Quadriceps strength: ↑(MD+1.5 )                   |   |   |   |
|           |    |     |                         |   | pain score: ↓ (MD -5.2)     | at 1 mo postoperatively                           |   |   |   |
|           |    |     |                         |   | VAS: ↓ (MD -1)              | Total Modified WOMAC score: ↓ (MD -17.7)          |   |   |   |
|           |    |     |                         |   | at 3 mo postoperatively     | Modified WOMAC stiffness score: ↓ (MD -2)         |   |   |   |
|           |    |     |                         |   | Modified WOMAC              | Modified WOMAC function                           |   |   |   |



---

pain score: ↓ (MD -

2.3)

VAS: NS

at 6 mo

postoperatively

score: ↓ (MD -10.3)

Quadriceps strength:

↑(MD+2.2)

at 3 mo postoperatively

Total Modified WOMAC

score: NS

Modified WOMAC stiffness

score: NS

Modified WOMAC function

score: NS

Quadriceps strength: NS

at 6 mo postoperatively

Knee Flexion: NS

Knee Extension: NS

Total knee ROM: NS

at 1, 3, 6 mo postoperatively

---

|                    |     |             |                                                           |                                 |                                                                                                                                                                                            |                                                                                                                                                                                                                                                                                                                                                                                                               |                                                                                                                                                                                                                                                                                                                                                          |   |                                                                                                                                                                                               |
|--------------------|-----|-------------|-----------------------------------------------------------|---------------------------------|--------------------------------------------------------------------------------------------------------------------------------------------------------------------------------------------|---------------------------------------------------------------------------------------------------------------------------------------------------------------------------------------------------------------------------------------------------------------------------------------------------------------------------------------------------------------------------------------------------------------|----------------------------------------------------------------------------------------------------------------------------------------------------------------------------------------------------------------------------------------------------------------------------------------------------------------------------------------------------------|---|-----------------------------------------------------------------------------------------------------------------------------------------------------------------------------------------------|
| Villadse<br>n 2014 | 165 | THA+<br>TKA | PT supervised<br>exercise +<br>education vs.<br>education | Postoperative<br>rehabilitation | For THR+TKR:<br>KOOS/HOOS Pain: ↓<br>(MD -5.4)<br><br>For THR:<br>KOOS/HOOS Pain:<br>NS changes at 6wk<br>and 3mo postop from<br>base line<br><br>For TKR:<br>KOOS/HOOS Pain: ↓<br>(MD -8) | For both THR+TKR or For<br>TKR:<br>KOOS/HOOS ADL: ↑ at<br>6wkpostop, but NS at 3mo<br>postop<br><br>For THR:<br>KOOS/HOOS ADL: NS at 6wk<br>and 3mo postop<br><br>For THR+TKR or THR or<br>TKR:<br>KOOS/HOOS symptoms: NS<br>KOOS/HOOS sport and<br>recreation: NS<br>At 6wk or 3 mo postop changes<br>from baseline.<br><br>Single-joint hip extension and<br>hip abduction: ↑ (~15% and<br>35% improvement) | For both THR+TKR or<br>TKR:<br>EQ5D VAS: ↓ (MD -<br>7.6) at 6wk postop, but<br>NS at 3mo postop<br><br>For THR:<br>EQ5D VAS: NS<br>At 6wk and 3mo<br>postop<br><br>For TKR:<br>EQ5D VAS: ↓ (MD -<br>8.8) changes at 6wk<br>postop from baseline,<br>but NS changes at 3mo<br>postop from baseline<br><br>For THR+TKR or THR<br>or TKR:<br>EQ5D index: NS | - | One patient with<br>hip OA<br>discontinued the<br>exercise due to<br>an increase in<br>pain.<br><br>2 patients from<br>the control<br>group developed<br>deep<br>periprosthetic<br>infection. |
|--------------------|-----|-------------|-----------------------------------------------------------|---------------------------------|--------------------------------------------------------------------------------------------------------------------------------------------------------------------------------------------|---------------------------------------------------------------------------------------------------------------------------------------------------------------------------------------------------------------------------------------------------------------------------------------------------------------------------------------------------------------------------------------------------------------|----------------------------------------------------------------------------------------------------------------------------------------------------------------------------------------------------------------------------------------------------------------------------------------------------------------------------------------------------------|---|-----------------------------------------------------------------------------------------------------------------------------------------------------------------------------------------------|

|                    |    |     |                                                                 |                                 |                                                                                   |                                                                                                                                                                                                                                                                                                                                                                                                         |   |                                                                             |                                                                                                                   |
|--------------------|----|-----|-----------------------------------------------------------------|---------------------------------|-----------------------------------------------------------------------------------|---------------------------------------------------------------------------------------------------------------------------------------------------------------------------------------------------------------------------------------------------------------------------------------------------------------------------------------------------------------------------------------------------------|---|-----------------------------------------------------------------------------|-------------------------------------------------------------------------------------------------------------------|
|                    |    |     |                                                                 |                                 | Chair stand: NS                                                                   | KOOS/HOOS QOL:                                                                                                                                                                                                                                                                                                                                                                                          |   |                                                                             |                                                                                                                   |
|                    |    |     |                                                                 |                                 | 20-m walk: NS                                                                     | NS                                                                                                                                                                                                                                                                                                                                                                                                      |   |                                                                             |                                                                                                                   |
|                    |    |     |                                                                 |                                 | Knee bends: NS                                                                    | At 6wk or 3 mo postop                                                                                                                                                                                                                                                                                                                                                                                   |   |                                                                             |                                                                                                                   |
|                    |    |     |                                                                 |                                 | Contra: NS                                                                        | changes from baseline.                                                                                                                                                                                                                                                                                                                                                                                  |   |                                                                             |                                                                                                                   |
|                    |    |     |                                                                 |                                 | at 3mo                                                                            |                                                                                                                                                                                                                                                                                                                                                                                                         |   |                                                                             |                                                                                                                   |
| Vukoma<br>novic 08 | 45 | THA | PT supervised<br>exercise<br>+education vs.<br>no interventions | Postoperative<br>rehabilitation | Pain at rest (VAS):<br>NS<br>Pain on movement<br>(VAS): NS<br>at discharge postop | First day of activities – use of<br>toilet↓ (MD -0.9d), use of<br>chair↓ (MD -1.05d), and<br>walking up and down stairs: ↓<br>(MD -1.67d)<br><br>Changing position in bed:<br>↑(MD +0.95)<br><br>Changing position on the edge:<br>↑(MD +0.9)<br><br>From sitting to standing: ↑(MD<br>+1.05)<br><br>Standing: ↑(MD +1.1)<br><br>Changing position to lying:<br>↑(MD +1.15)<br><br>Walking: ↑(MD +1.15) | - | LOS: NS (- MD<br>+0.4d)<br><br>Class with the<br>therapist: ↓ (MD-<br>1.65) | Five patients<br>were excluded<br>postoperatively<br>because of<br>complications<br>during and post<br>operation. |

---

Use of toilet: ↑(MD +1.9)

Use of Chair: ↑(MD +1.9)

Walking up and down stairs:

↑(MD +1.8)

Endurance while walking:

↑(MD +1)

at the 3rd day postoperatively

Changing position in bed:

↑(MD +0.4)

Changing position on the edge:

↑(MD +0.45)

From sitting to standing: ↑(MD

+0.45)

Standing: ↑(MD +0.45)

Changing position to lying:

↑(MD +0.45)

Walking: ↑(MD +0.5)

Use of toilet: ↑(MD +1)

Use of Chair: ↑(MD +1.25)

Walking up and down stairs:

---

---

|      |    |     |                  |               |   |                                 |   |   |                |
|------|----|-----|------------------|---------------|---|---------------------------------|---|---|----------------|
|      |    |     |                  |               |   | ↑(MD +1.85)                     |   |   |                |
|      |    |     |                  |               |   | Endurance while walking:        |   |   |                |
|      |    |     |                  |               |   | ↑(MD +1)                        |   |   |                |
|      |    |     |                  |               |   | at the discharge                |   |   |                |
|      |    |     |                  |               |   | Flexion of the hip flexed knee: |   |   |                |
|      |    |     |                  |               |   | NS                              |   |   |                |
|      |    |     |                  |               |   | Flexion of the hip extended     |   |   |                |
|      |    |     |                  |               |   | knee: NS                        |   |   |                |
|      |    |     |                  |               |   | Abduction:: NS                  |   |   |                |
|      |    |     |                  |               |   | Harris hip score: NS            |   |   |                |
|      |    |     |                  |               |   | JOA hip score: NS               |   |   |                |
|      |    |     |                  |               |   | At discharge postoperatively    |   |   |                |
|      |    |     |                  |               |   | Oxford Hip Score: NS            |   |   |                |
|      |    |     |                  |               |   | At 15 mo postoperatively        |   |   |                |
| Wang | 28 | THA | PT supervised    | Postoperative | - | Cadence (steps/min): ↑(MD       | - | - | Complications: |
| 2002 |    |     | pre- & post-     | exercise or   |   | +18)                            |   |   | NS             |
|      |    |     | operative        | usual care    |   | Stride length: ↑(MD +0.06m)     |   |   | no wound       |
|      |    |     | exercise vs. PT  |               |   | Gait velocity: ↑(MD +0.28)      |   |   | infections,    |
|      |    |     | supervised pre-  |               |   | At 3 wk postoperatively         |   |   | joint          |
|      |    |     | & post-operative |               |   |                                 |   |   |                |

---

---

usual care

Cadence (steps/min): ↑(MD +9)

Stride length: NS

Gait velocity: ↑(MD +0.2)

At 12 wk postoperatively

Cadence (steps/min): ↑(MD +10)

Stride length: NS

Gait velocity: ↑(MD +0.21)

At 24 wk postoperatively

6MWT: NS

At 12 wk postoperatively

6MWT: ↑(MD +64m)

At 24 wk postoperatively

Weidenh 39  
ielm  
1993

TKP

PT supervised  
exercise vs. no  
exercise

-

VRS (no, mild,  
moderate, and severe  
pain): NS

Passive ROM: NS

-

-

-

No. patients grading the knee as  
stable or unstable: NS

---

dislocations,  
complications  
requiring  
return to the  
operating  
room,  
or major  
medical  
complications

|                     |     |     |                                                    |   |                                     |                                                                                         |                                                                               |                                                           |                         |
|---------------------|-----|-----|----------------------------------------------------|---|-------------------------------------|-----------------------------------------------------------------------------------------|-------------------------------------------------------------------------------|-----------------------------------------------------------|-------------------------|
|                     |     |     |                                                    |   | Pain at walk: NS                    | Isokinetic quadriceps strength                                                          |                                                                               |                                                           |                         |
|                     |     |     |                                                    |   | At 3mo.                             | (at 30 and 90 degree): NS                                                               |                                                                               |                                                           |                         |
|                     |     |     |                                                    |   |                                     | Walking speed (self-selected and maximal): NS                                           |                                                                               |                                                           |                         |
|                     |     |     |                                                    |   |                                     | at 3 mo postoperatively                                                                 |                                                                               |                                                           |                         |
| Williams<br>on 2007 | 120 | TKR | PT supervised<br>exercise vs.<br>education leaflet | - | VAS: NS (MD -0.09<br>at 3mo postop) | OKS: NS (MD +1.61)<br>50-m walk: NS (MD +2.51s)<br>WOMAC: NS (MD+1.33) at<br>3mo postop | HAD score anxiety: NS<br>(MD +1.84)<br>HAD score depression:<br>NS (MD -0.25) | HLOS: NS (MD -<br>1.27d)<br>Cost of PT: £9 per<br>patient | No adverse<br>responses |

---

6MWT: 6-minute walk test; ADL: activities of daily living; APSI: anteroposterior stability index; EQ5D: EuroQol 5 Dimension Health Questionnaire; HAD: Hospital Anxiety and Depression score; HOOS: Hip disability and Osteoarthritis Outcome Score; ILAS: Iowa Level of Assistance Scale; KOOS: Knee injury and Osteoarthritis Outcome Score; KSS: Knee Society Score; LASA: Longitudinal Aging Study Amsterdam; LOS: length of stay; MCS: mental component summary; MD: mean difference; MLSI: medio-lateral stability index; NS: not significant; OA: Osteoarthritis; OKS: Oxford Knee Score questionnaire; OSI: overall stability index; PCS: physical component summary; postop: postoperative; preop: preoperative; PT: physical therapist; ROM: range of motion; THR: total hip replacement; TKP: total knee replacement; TUG: Timed Up & Go; VAS: visual analogue scale; VRS: verbal rating scale; WOMAC: Western Ontario and McMaster Universities Arthritis Index
