# Supplementary material for: Does preoperative rehabilitation for patients planning to undergo joint replacement surgery improve outcomes? A systematic review and meta-analysis of randomised controlled trials
Source: HighWire-hosted journal article supplement (doi:10.1136/bmjopen-2015-009857), 2016-02-01
Supplement: bmjopen-2015-009857supp_table4.pdf [file bmjopen-2015-009857supp_table4.pdf]

**Supplementary Table 4 Sensitivity Analysis to test robustness of results after removing total score**

| <b>Outcomes</b>             | <b>SMD (95%CI)</b>     | <b>RoM (95%CI)</b>  | <b>WMD (95%CI)<br/>after removing total<br/>score</b> |
|-----------------------------|------------------------|---------------------|-------------------------------------------------------|
| Pain at 4 weeks or less     | -0.70 (-1.46 to +0.06) | 0.74 (0.68 to 0.81) | NR                                                    |
| Pain at 6 to 8 weeks        | -0.17 (-0.38 to +0.05) | 0.88 (0.73 to 1.06) | NR                                                    |
| Pain at 12 weeks            | -0.20 (-0.40 to 0.00)  | 0.87 (0.76 to 1.01) | NR                                                    |
| Pain at 24 weeks            | -0.26 (-0.56 to +0.04) | 0.78 (0.60 to 1.02) | NR                                                    |
| Pain at 1 year or more      | -0.14 (-0.51 to +0.24) | 0.90 (0.68 to 1.20) | NR                                                    |
| Function at 4 weeks or less | -0.58 (-1.45 to +0.29) | 0.90 (0.79 to 1.04) | -5.0 (-9.4 to -0.6)                                   |
| Function at 6 to 8 weeks    | -0.27 (-0.49 to -0.05) | 0.86 (0.76 to 1.00) | NR                                                    |
| Function at 12 weeks        | -0.48 (-0.91 to -0.05) | 0.82 (0.67 to 1.00) | -4.5 (-7.9 to -1.1)                                   |
| Function at 24 weeks        | -0.49 (-1.47 to +0.49) | 0.87 (0.56 to 1.33) | +0.1 (-4.1 to +4.3)                                   |
| Function at 1 year or more  | -0.01 (-0.24 to +0.22) | 1.01 (0.88 to 1.15) | -0.4 (-2.6 to +1.8)                                   |

SMD: Standardized mean difference; RoM: Ratio of mean; WMD: Weighted mean difference; NR: not relevant since total score was not included
